# Supplementary material for: Physicians’ adherence to management guidelines for H. pylori infection and gastroesophageal reflux disease: a cross-sectional study
Source: Springer Nature journal article supplement (doi:10.1186/s13584-020-00389-y), 2020-06-11
Supplement: MOESM1 [file 18074334]

## Appendix 1- Questionnaire

**Module I:** The following questions are related to the diagnosis and treatment of *Helicobacter pylori* infection in adults. **Please, choose only one answer in all the following questions.**

### 1. Do you use any guidelines for the management of *H. pylori* infection?

- 1) No
- 2) Yes, please specify which guidelines: \_\_\_\_\_

### 2. In the following situations, how often do you usually refer to the diagnosis of *H. pylori*?

|                                                                                         | Always | Usually, yes | Usually, no | Never |
|-----------------------------------------------------------------------------------------|--------|--------------|-------------|-------|
| Suspected duodenal or gastric ulcer                                                     | 4      | 3            | 2           | 1     |
| First-degree relatives of gastric cancer patients                                       | 4      | 3            | 2           | 1     |
| Gastroesophageal reflux disease                                                         | 4      | 3            | 2           | 1     |
| Unexplained iron deficiency anemia                                                      | 4      | 3            | 2           | 1     |
| History of peptic ulcer in patients who began<br>Prolonged therapy of aspirin or NSAIDs | 4      | 3            | 2           | 1     |

### 3. To what extent do you agree with the following statement: “*H. pylori* is a definitive cause of gastric cancer”:

- 1) Strongly agree
- 2) Somewhat agree
- 3) Disagree
- 4) Strongly disagree

**4. To diagnose *H. pylori* in young patients who have dyspepsia without alarm symptoms such as weight loss, anemia, I usually refer to:**

- 1) Specialist in gastroenterology
- 2) Gastroscopy
- 3) Urea breath test
- 4) Stool antigen enzyme immunoassay
- 5) Other, please specify: \_\_\_\_\_

**5. To diagnose *H. pylori* in patients with dyspepsia and alarm symptoms such as weight loss, I usually refer to:**

- 1) Specialist in gastroenterology
- 2) Gastroscopy
- 3) Urea breath test
- 4) Stool antigen enzyme immunoassay
- 5) Other, please specify: \_\_\_\_\_

**6. What is the first-line treatment that you usually prescribe for patients with a positive *H. pylori* result?**

- 1) Triple therapy with PPIs /clarithromycin/amoxicillin or metronidazole
- 2) Quadruple based on Bismuth
- 3) Quadruple with PPIs /clarithromycin/amoxicillin/metronidazole
- 4) Probiotics
- 5) Refer the patient to a specialist in gastroenterology
- 6) Other; please specify: \_\_\_\_\_

**7. For how many days do you prescribe the treatment?**

- 1) 7 days
- 2) 10 days
- 3) 14 days
- 4) Other; please specify: \_\_\_\_\_

**8. What follow-up do you usually recommend after completing *H. pylori* treatment?**

- 1) Do not refer to additional tests if symptoms resolved
- 2) Refer to specialist in gastroenterology at least 1 month after therapy
- 3) Refer the patient to urea breath test at least 1 month after therapy
- 4) Refer the patient to serology test at least 1 month after therapy
- 5) Refer to perform stool antigen enzyme immunoassay test at least 1 month after therapy
- 6) Other; please specify: \_\_\_\_\_

**9. How do you usually do in patients with treatment failure after *H. pylori* treatment?**

- 1) Do not refer to additional tests if symptoms resolved
- 2) Recommend the same treatment for a longer duration
- 3) Refer the patient to specialist in gastroenterology
- 4) Recommend a different treatment; please specify: \_\_\_\_\_
- 5) Other; please specify: \_\_\_\_\_

**Module II:** The following questions are related to the diagnosis and treatment of gastroesophageal reflux disease in adults.

**1. Did you use any guidelines for the management of gastroesophageal reflux disease?**

1) No

2) Yes, please specify: \_\_\_\_\_

**4. How often do you choose each of the following for diagnosis and treatment in suspected cases of gastroesophageal reflux disease? (Please choose only one answer):**

|                                                                                                                          | Always | Usually, yes | Usually, no | Never |
|--------------------------------------------------------------------------------------------------------------------------|--------|--------------|-------------|-------|
| I refer to cardiologic work-up prior diagnosis of reflux, if complaints of chest pain exist                              | 4      | 3            | 2           | 1     |
| I refer to barium radiographs as part of a GERD diagnosis                                                                | 4      | 3            | 2           | 1     |
| I recommend weight loss for patients with overweight or obese as part of the treatment of uncomplicated GERD             | 4      | 3            | 2           | 1     |
| I refer to evaluation of a specialist in gastroenterology in patients suspected to have GERD complications               | 4      | 3            | 2           | 1     |
| I recommend empiric treatment with PPIs for patients with typical symptoms of uncomplicated GERD                         | 4      | 3            | 2           | 1     |
| I recommend to continue PPI therapy in patients who still suffer from GERD symptoms after cessation of initial treatment | 4      | 3            | 2           | 1     |
| I recommend on sleeping with elevated position as part of GERD treatment                                                 | 4      | 3            | 2           | 1     |

|                                                                                                                                     |   |   |   |   |
|-------------------------------------------------------------------------------------------------------------------------------------|---|---|---|---|
| I recommend changes in lifestyle as part of the treatment,<br>such as reduced consumption of caffeine, chocolate and<br>fried foods | 4 | 3 | 2 | 1 |
|-------------------------------------------------------------------------------------------------------------------------------------|---|---|---|---|
